# Supplementary material for: Gamified E-learning in medical terminology: the TERMInator tool
Source: PubMed Central journal article supplement (PMC7456391; doi:10.1186/s12909-020-02204-3), 2020-08-28
Supplement: 12909_2020_2204_MOESM1_ESM.pdf [file 12909_2020_2204_MOESM1_ESM.pdf]

## TERMinator Evaluation Questionnaire

1. To what extent do you agree with the following statements?

|                                                                           | <i>I fully agree</i> | <i>I agree more with</i> | <i>I disagree more with</i> | <i>I strongly disagree</i> |
|---------------------------------------------------------------------------|----------------------|--------------------------|-----------------------------|----------------------------|
| The information and text design of TERMinator are appealing.              | =                    | =                        | =                           | =                          |
| The tasks are easy to understand.                                         | =                    | =                        | =                           | =                          |
| The contents of the TERMinator are a good complement to the seminars.     | =                    | =                        | =                           | =                          |
| Getting familiar with TERMinator costs me a lot of time.                  | =                    | =                        | =                           | =                          |
| The structure of TERMinator is clear, thus, I found the materials easily. | =                    | =                        | =                           | =                          |
| The handling of TERMinator is simple.                                     | =                    | =                        | =                           | =                          |
| The number of digital images and graphics provided is sufficient.         | =                    | =                        | =                           | =                          |
| The number of digital images and graphics provided is sufficient.         | =                    | =                        | =                           | =                          |

2. No technical problems occurred when using the Moodle course TERMinator

I agree =

I disagree = --> If problems occurred during the utilisation of the TERMIerator, please name/describe them briefly:

---

---

3. I will continue working on the TERMIerator as soon as more content is available.

I agree =

I disagree = --> What should the TERMIerator offer you in order to make it worth your working on it further? \_\_\_\_\_

4. How do you evaluate the media/methods listed below regarding your personal learning behaviour in medical terminology?

|                                                | <i>Irrelevant</i> | <i>Not very important</i> | <i>important</i> | <i>Very important</i> | <i>Most important</i> |
|------------------------------------------------|-------------------|---------------------------|------------------|-----------------------|-----------------------|
| Student working/learning groups                | =                 | =                         | =                | =                     | =                     |
| Textbooks for medical students                 | =                 | =                         | =                | =                     | =                     |
| Learning with PowerPoint slides from seminar   | =                 | =                         | =                | =                     | =                     |
| Learning with one's own notes from the seminar | =                 | =                         | =                | =                     | =                     |

|                                       |   |   |   |   |   |
|---------------------------------------|---|---|---|---|---|
| Further literature search and reading | = | = | = | = | = |
| Utilisation of e-learning offers      | = | = | = | = | = |
| Written exams from previous terms     | = | = | = | = | = |
| Tutorials held by other students      | = | = | = | = | = |

5. Further suggestions / comments on TERMIInator:

---



---
